# Supplementary material for: Identification of Genes Related to Growth and Lipid Deposition from Transcriptome Profiles of Pig Muscle Tissue
Source: PLoS One. 2015 Oct 27;10(10):e0141138. doi: 10.1371/journal.pone.0141138 (PMC4624711; doi:10.1371/journal.pone.0141138)
Supplement: S5 Table — (XLSX) [file pone.0141138.s013.xlsx]

## Sheet: Table S5
S5 Table. The resource distribution of the reads
Reads Annotation	Count	Percentage
DSP
miRBase (Sus scrofa)	4567097	0.901037
Sus_scrofa. Sscrofa10.2.67.ncrna	77516	0.015293
pirna	15220	0.00300274
Rfam	277841	0.0548149
Unannotated	131037	0.0258521
Total	5068711
TP
miRBase (Sus scrofa)	3689978	0.731698
Sus_scrofa. Sscrofa10.2.67.ncrna	55023	0.0109107
pirna	9572	0.00189806
Rfam	1054970	0.209193
Unannotated	233493	0.0463001
Total	5043036
LL
miRBase (Sus scrofa)	2555608	0.858964
Sus_scrofa. Sscrofa10.2.67.ncrna	58233	0.0195727
pirna	37214	0.012508
Rfam	196179	0.0659376
Unannotated	127989	0.0430183
Total	2975223
YY
miRBase (Sus scrofa)	5464190	0.770916
Sus_scrofa. Sscrofa10.2.67.ncrna	29025	0.004095
pirna	8990	0.00126836
Rfam	1382957	0.195115
Unannotated	202757	0.028606
Total	7087919
